# Supplementary material for: Microsecond 3MLCT excited state lifetimes in bis-tridentate Ru(ii)-complexes: significant reductions of non-radiative rate constants
Source: Royal Society of Chemistry journal article supplement (doi:10.1039/c7dt02437a), 2017-01-01

**Supporting Information for:**

**Microsecond <sup>3</sup>MLCT Excited State Lifetimes in Bis-Tridentate Ru(II)-complexes: Significant Reductions of Non-Radiative Rate Constants.**

Maria Abrahamsson, Hans-Christian Becker and Leif Hammarström\*

Department of Chemistry - Ångström Laboratory, Uppsala University, Box 523,  
SE-751 20 Uppsala, Sweden

\*corresponding author: [leif.hammarstrom@kemi.uu.se](mailto:leif.hammarstrom@kemi.uu.se)

**Contents:**

Low temperature emission spectra and results from spectral fitting.

**Complex 1** File name DQP\_1

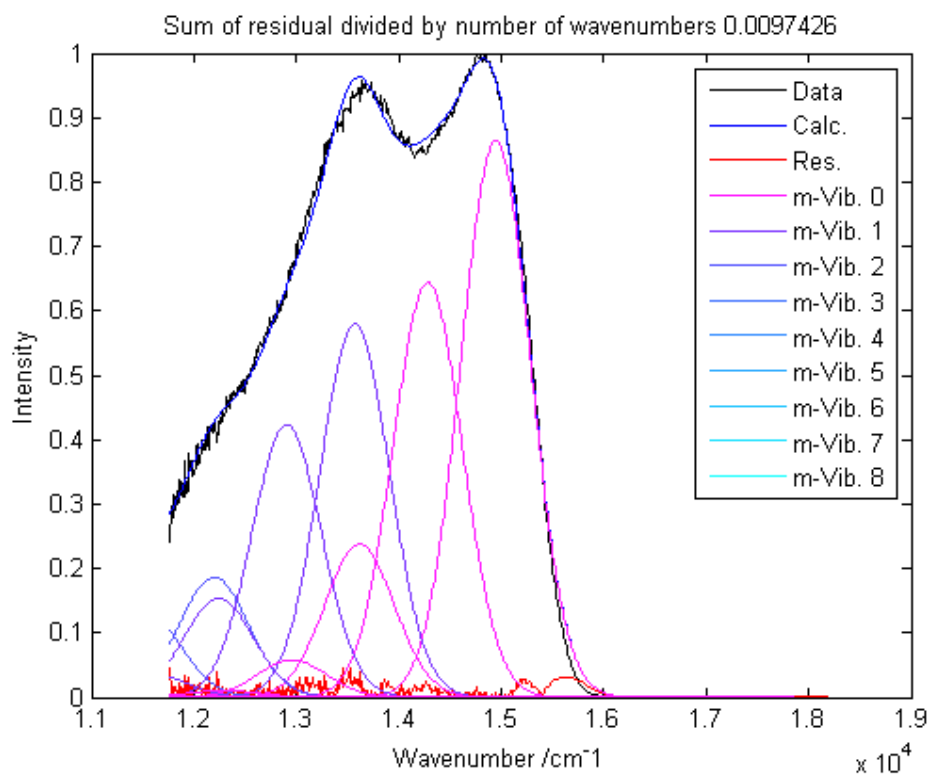

**Complex 2** File name DE\_1

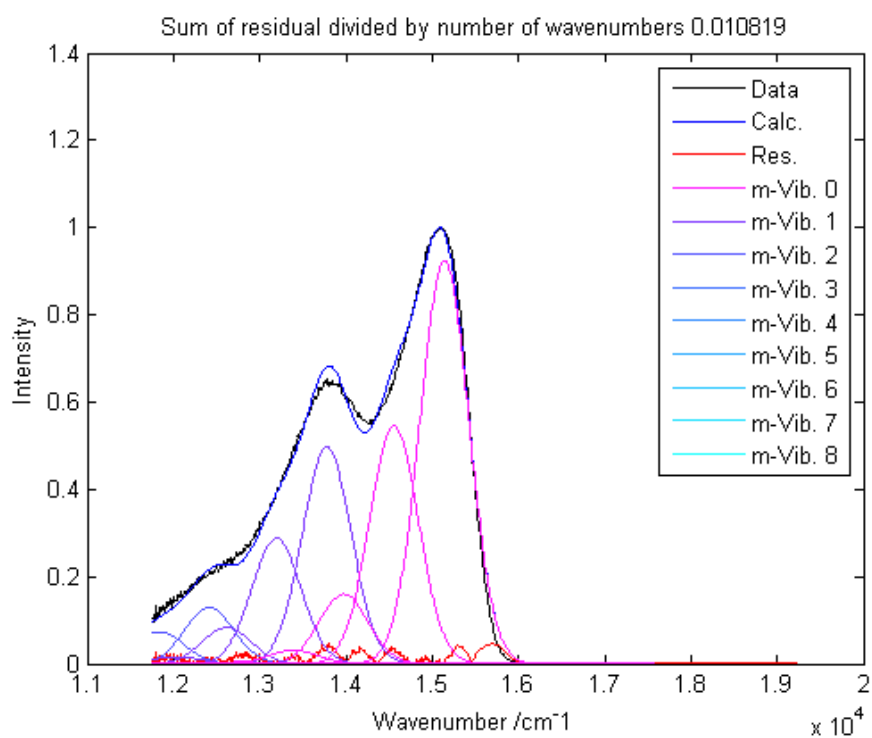

**Complex 3**

File: AM\_1

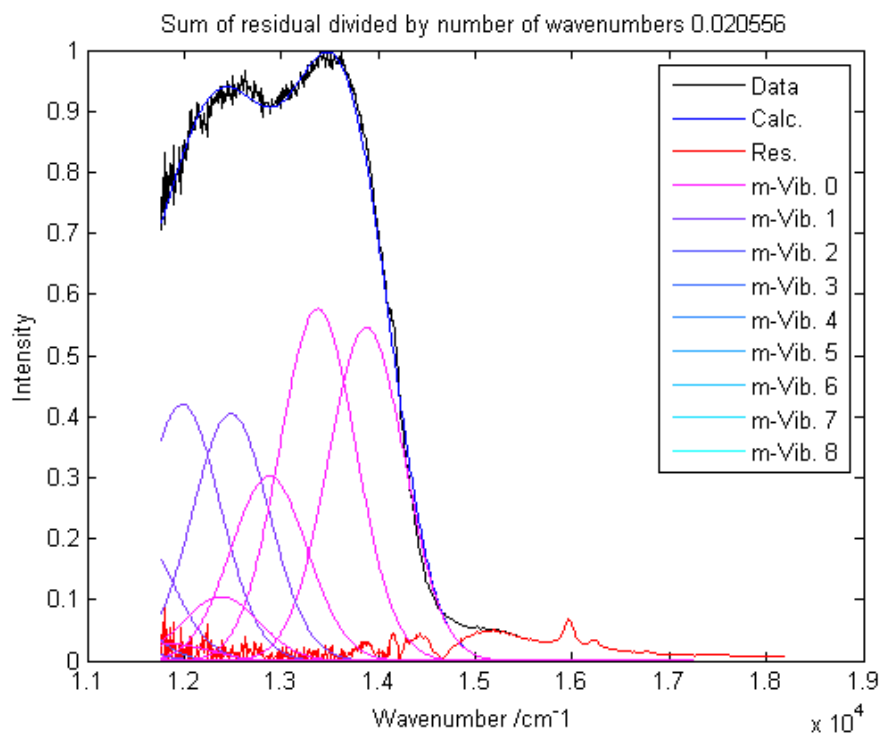

**Complex 4:** File name ME\_2

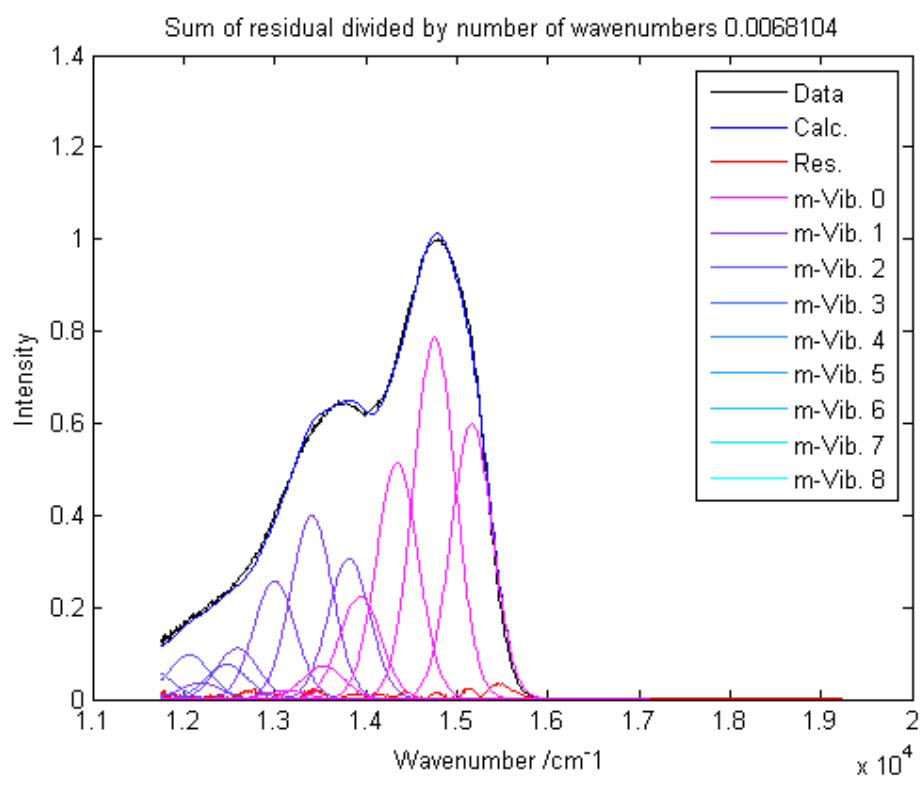

**Complex 5:** File name DT\_2

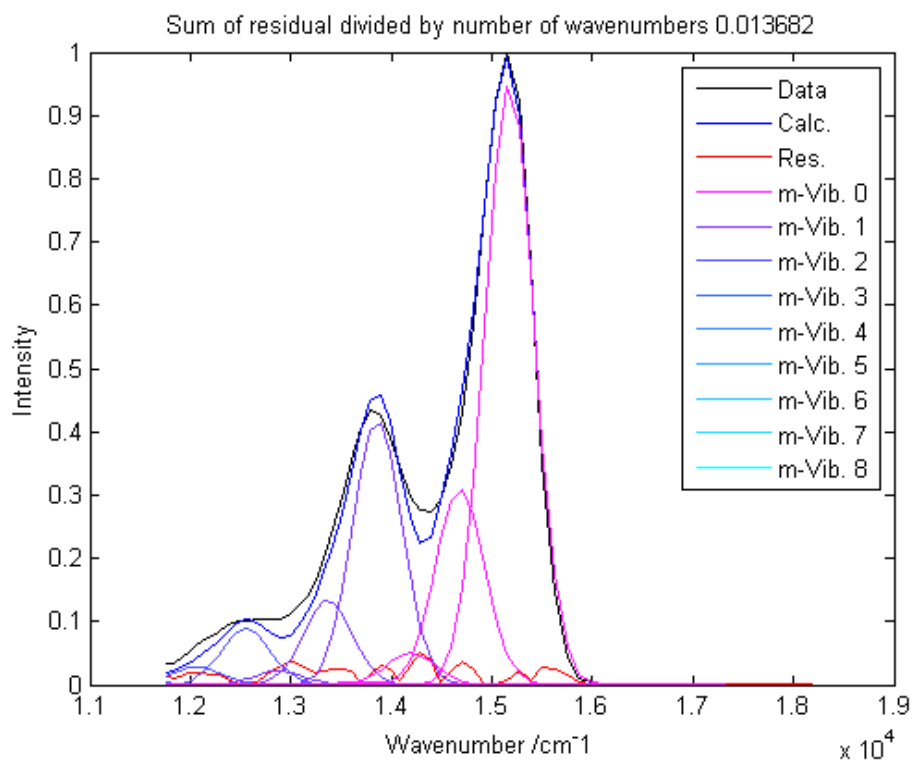

Supplement: c7dt02437a1.pdf [file c7dt02437a1.pdf]
